# Supplementary material
Source: Research Square preprint supplement (doi:10.21203/rs.3.rs-8788390/v1)
Supplement: Supplementary file 1 [file 1127f9ab082ede72c9f6cd5d.docx]

S-Table 4. Univariate Logistic Regression Analysis for Mechanical Ventilation >72 Hours

| **Characteristic** | | | | **OR (95% CI)** | | --- | | | | **p-value** | | |
| --- | --- | --- | --- | --- | --- | --- | --- | --- | --- |
| **Group** | | |  | | |  | | |
| SCS | | | 1.00 (Ref) | | |  | | |
| IFLT | | | 0.55 (0.20-1.35) | | | 0.222 | | |
| **Donor Blood Type** | | |  | | |  | | |
| A | | | 1.00 (Ref) | | |  | | |
| B | | | 0.75 (0.27-1.85) | | | 0.559 | | |
| O | | | 1.13 (0.50-2.50) | | | 0.765 | | |
| AB | | | 1.34 (0.20-5.37) | | | 0.711 | | |
| **Donor Gender** | | |  | | |  | | |
| Male | | | 1.00 (Ref) | | |  | | |
| Female | | | 0.28 (0.04-0.98) | | | 0.089 | | |
| **Cause of Death** | | |  | | |  | | |
| CVA | | | 1.00 (Ref) | | |  | | |
| Anoxia | | | 0.74 (0.11-2.77) | | | 0.703 | | |
| Head trauma | | | 1.08 (0.47-2.41) | | | 0.850 | | |
| Others | | | 1.48 (0.22-6.04) | | | 0.622 | | |
| **Recipient CHILD Grade** | | |  | | |  | | |
| 1 | | | 1.00 (Ref) | | |  | | |
| 2 | | | 0.56 (0.19-1.46) | | | 0.251 | | |
| 3 | | | 2.68 (1.05-7.18) | | | 0.041* | | |
| **Recipient Gender** | | |  | | |  | | |
| Male | | | 1.00 (Ref) | | |  | | |
| Female | | | 1.12 (0.36-2.95) | | | 0.830 | | |
| **Recipient Blood Type** | | | |  | | |  | | |
| A | | | | 1.00 (Ref) | | |  | | |
| B | | | | 0.85 (0.32-2.03) | | | 0.733 | | |
| O | | | | 1.08 (0.46-2.42) | | | 0.857 | | |
| AB | | | 1.23 (0.28-3.98) | | | 0.750 | | |
| **Recipient Etiology** | | |  | | |  | | |
| Tumor | | | 1.00 (Ref) | | |  | | |
| Liver failure | | | 0.44 (0.14-1.13) | | | 0.113 | | |
| Liver Cirrhosis | | | 0.71 (0.04-3.96) | | | 0.753 | | |
| Others | | | 3.79 (1.12-11.47) | | | 0.022* | | |
| **Donor Hepatic Steatosis** | | |  | | |  | | |
| <30% | | | 1.00 (Ref) | | |  | | |
| ≥30% | | | 0.75 (0.17-2.33) | | | 0.655 | | |
| **Donor age** | | | 1.00 (0.97-1.02) | | | 0.764 | | |
| **Donor BMI** | | | 1.05 (0.93-1.19) | | | 0.454 | | |
| **Donor Crea** | | | 1.00 (1.00-1.00) | | | 0.822 | | |
| **Donor Na** | | | 1.03 (0.99-1.06) | | | 0.159 | | |
| **Donor K** | | | 1.46 (0.86-2.47) | | | 0.149 | | |
| **Donor AST** | | | 1.00 (1.00-1.00) | | | 0.968 | | |
| **Donor ALT** | | | 1.00 (1.00-1.00) | | | 0.522 | | |
| **Donor Tbil** | | | 1.01 (0.99-1.02) | | | 0.203 | | |
| **Donor Hb** | | | 1.00 (0.99-1.02) | | | 0.757 | | |
| **Recipient age** | | | 1.00 (0.97-1.04) | | | 0.924 | | |
| **Recipient BMI** | | | 1.06 (0.95-1.18) | | | 0.275 | | |
| **Recipient MELD Score** | | | 1.06 (1.02-1.10) | | | 0.003* | | |
| **Recipient Child-Pugh Grade** | | | 1.20 (1.00-1.45) | | | 0.053 | | |
| **Recipient Tbil** | | | 1.00 (1.00-1.00) | | | 0.109 | | |
| **Recipient INR** | | | 1.40 (1.01-2.10) | | | 0.058 | | |
| **Recipient ALT** | | | 1.00 (0.99-1.00) | | | 0.786 | | |
| **Recipient AST** | | | 1.00 (1.00-1.01) | | | 0.112 | | |
| **Blood loss** | | | 1.07 (1.03-1.11) | | | <0.001 | | |
| **Blood transfusion** | | | 1.10 (1.04-1.16) | | | 0.001* | | |
| **Surgery time** | | | 1.30 (1.06-1.59) | | | 0.010* | | |
| **Cold Ischemia time** | | | 1.00 (1.00-1.00) | | | 0.064 | | |
| **Anhepatic phase** | | | 1.01 (0.99-1.04) | | | 0.369 | | |

Abbreviation: SCS: static cold storage；IFLT: Ischemia-free liver transplantation ; CI: Confidence Interval; OR: Odds Ratio. CVA: cerebralvascular accident; BMI: body mass index; AST: aspartate aminotransferase; ALT: alanine aminotransferase; Tbil: total bilirubin; Hb: hemoglobin; INR: international normalized ratio; MELD: Model for End-Stage Liver Disease. The use of asterisk is to show that p-value of the statistic is less than 0.05, making it more prominent.
