# Supplementary material
Source: Research Square preprint supplement (doi:10.21203/rs.3.rs-8788390/v1)
Supplement: Supplementary file 2 [file 44816c8a9ef2cf6cf753644d.docx]

S-Table 3. Univariate Logistic Regression Analysis for AKI

| **Characteristic** | | | | **OR (95% CI)** | | --- | | | | **p-value** | | |
| --- | --- | --- | --- | --- | --- | --- | --- | --- | --- |
| **Group** | | |  | | |  | | |
| SCS | | | 1.00 (Ref) | | |  | | |
| IFLT | | | 1.35 (0.74-2.44) | | | 0.324 | | |
| **Donor Blood Type** | | |  | | |  | | |
| A | | | 1.00 (Ref) | | |  | | |
| B | | | 1.01 (0.52-1.90) | | | 0.980 | | |
| O | | | 1.11 (0.62-1.96) | | | 0.721 | | |
| AB | | | 0.41 (0.06-1.58) | | | 0.254 | | |
| **Donor Gender** | | |  | | |  | | |
| Male | | | 1.00 (Ref) | | |  | | |
| Female | | | 1.17 (0.58-2.32) | | | 0.650 | | |
| **Cause of Death** | | |  | | |  | | |
| CVA | | | 1.00 (Ref) | | |  | | |
| Anoxia | | | 0.71 (0.23-1.91) | | | 0.526 | | |
| Head trauma | | | 1.30 (0.73-2.31) | | | 0.372 | | |
| Others | | | 0.77 (0.17-2.68) | | | 0.706 | | |
| **Recipient CHILD Grade** | | |  | | |  | | |
| 1 | | | 1.00 (Ref) | | |  | | |
| 2 | | | 0.65 (0.33-1.25) | | | 0.201 | | |
| 3 | | | 1.25 (0.65-2.39) | | | 0.499 | | |
| **Recipient Gender** | | |  | | |  | | |
| Male | | | 1.00 (Ref) | | |  | | |
| Female | | | 0.69 (0.29-1.49) | | | 0.364 | | |
| **Recipient Blood Type** | | | |  | | |  | | |
| A | | | | 1.00 (Ref) | | |  | | |
| B | | | | 0.99 (0.52-1.84) | | | 0.970 | | |
| O | | | | 0.95 (0.52-1.71) | | | 0.856 | | |
| AB | | | 0.52 (0.15-1.48) | | | 0.263 | | |
| **Recipient Etiology** | | |  | | |  | | |
| Tumor | | | 1.00 (Ref) | | |  | | |
| Liver failure | | | 0.95 (0.51-1.74) | | | 0.875 | | |
| Liver Cirrhosis | | | 1.36 (0.35-4.67) | | | 0.631 | | |
| Others | | | 1.07 (0.33-3.08) | | | 0.901 | | |
| **Donor Hepatic Steatosis** | | |  | | |  | | |
| <30% | | | 1.00 (Ref) | | |  | | |
| ≥30% | | | 0.95 (0.40-2.14) | | | 0.913 | | |
| **Donor age** | | | 0.99 (0.97-1.01) | | | 0.156 | | |
| **Donor BMI** | | | 1.01 (0.92-1.10) | | | 0.845 | | |
| **Donor Crea** | | | 1.00 (1.00-1.00) | | | 0.208 | | |
| **Donor Na** | | | 1.01 (0.98-1.03) | | | 0.576 | | |
| **Donor K** | | | 0.86 (0.57-1.27) | | | 0.443 | | |
| **Donor AST** | | | 1.00 (1.00-1.00) | | | 0.574 | | |
| **Donor ALT** | | | 1.00 (1.00-1.00) | | | 0.923 | | |
| **Donor Tbil** | | | 1.00 (0.99-1.01) | | | 0.942 | | |
| **Donor Hb** | | | 1.00 (0.99-1.01) | | | 0.731 | | |
| **Recipient age** | | | 1.02 (1.00-1.05) | | | 0.056 | | |
| **Recipient BMI** | | | 1.05 (0.97-1.13) | | | 0.245 | | |
| **Recipient MELD Score** | | | 0.98 (0.95-1.01) | | | 0.262 | | |
| **Recipient Child-Pugh Grade** | | | 1.02 (0.89-1.16) | | | 0.801 | | |
| **Recipient Tbil** | | | 1.00 (1.00-1.00) | | | 0.271 | | |
| **Recipient INR** | | | 1.25 (0.93-1.77) | | | 0.159 | | |
| **Recipient ALT** | | | 1.00 (0.99-1.00) | | | 0.460 | | |
| **Recipient AST** | | | 1.00 (0.99-1.00) | | | 0.222 | | |
| **Blood loss** | | | 1.02 (0.99-1.06) | | | 0.191 | | |
| **Blood transfusion** | | | 1.02 (0.97-1.07) | | | 0.456 | | |
| **Surgery time** | | | 0.98 (0.82-1.15) | | | 0.804 | | |
| **Cold Ischemia time** | | | 1.00 (1.00-1.00) | | | 0.630 | | |
| **Anhepatic phase** | | | 1.00 (0.98-1.02) | | | 0.871 | | |

Abbreviation: AKI: acute kidney injury; SCS: static cold storage；IFLT: Ischemia-free liver transplantation ; CI: Confidence Interval; OR: Odds Ratio. CVA: cerebralvascular accident; BMI: body mass index; AST: aspartate aminotransferase; ALT: alanine aminotransferase; Tbil: total bilirubin; Hb: hemoglobin; INR: international normalized ratio; MELD: Model for End-Stage Liver Disease. The use of asterisk is to show that p-value of the statistic is less than 0.05, making it more prominent.
