# Supplementary material
Source: Research Square preprint supplement (doi:10.21203/rs.3.rs-8788390/v1)
Supplement: Supplementary file 3 [file 4720cbe080fcb38d7711d61a.docx]

sTable 3. Multivariate Logistic Regression Analysis for ICU stay>72hours

| **Characteristic** | **OR (95% CI)** | **p-value** |
| --- | --- | --- |
| **Group** |  |  |
| SCS | Reference |  |
| IFLT | 0.42 (0.19, 0.90) | 0.031* |
| **Donor BMI** | 1.11 (0.99, 1.24) | 0.073 |
| **Recipient MELD score** | 0.99 (0.94, 1.04) | 0.786 |
| **Recipient Child-Pugh score** | 1.20 (0.99, 1.46) | 0.067 |
| **Recipient INR** | 1.61 (0.88, 3.06) | 0.123 |
| **Blood loss** | 1.01 (0.96, 1.07) | 0.642 |
| **Blood transfusion** | 1.01 (0.93, 1.10) | 0.752 |
| **Donor Na** | 1.04 (1.01, 1.07) | 0.016 |
| **Recipient BMI** | 1.07 (0.97, 1.19) | 0.173 |
| **Surgery time** | 1.28 (1.03, 1.59) | 0.026 |
|  |  |  |

Abbreviation: EAD: early allograft dysfunction; SCS: static cold storage；IFLT: Ischemia-free liver transplantation ; CI: Confidence Interval; OR: Odds Ratio. BMI: body mass index; INR: international normalized ratio; MELD: Model for End-Stage Liver Disease. The use of asterisk is to show that p-value of the statistic is less than 0.05, making it more prominent.
