# Supplementary material
Source: Research Square preprint supplement (doi:10.21203/rs.3.rs-8788390/v1)
Supplement: Supplementary file 4 [file 6b9227df8d0e258c40ee1156.docx]

S-Table 5. Univariate Logistic Regression Analysis for 31-Day Survival

| **Characteristic** | | | | **HR (95% CI)** | | --- | | | | **p-value** | | |
| --- | --- | --- | --- | --- | --- | --- | --- | --- | --- |
| **Group** | | |  | | |  | | |
| SCS | | | 1.00 (Ref) | | |  | | |
| IFLT | | | 0.63 (0.17-2.29) | | | 0.482 | | |
| **Donor Blood Type** | | |  | | |  | | |
| A | | | 1.00 (Ref) | | |  | | |
| B | | | 1.82 (0.60-5.57) | | | 0.293 | | |
| O | | | 0.26 (0.06-1.19) | | | 0.083 | | |
| AB | | | 0.00 (0.00-Inf) | | | 0.998 | | |
| **Donor Gender** | | |  | | |  | | |
| Male | | | 1.00 (Ref) | | |  | | |
| Female | | | 0.72 (0.16-3.23) | | | 0.665 | | |
| **Cause of Death** | | |  | | |  | | |
| CVA | | | 1.00 (Ref) | | |  | | |
| Anoxia | | | 0.00 (0.00-Inf) | | | 0.998 | | |
| Head trauma | | | 1.06 (0.35-3.25) | | | 0.914 | | |
| Others | | | 1.49 (0.19-11.43) | | | 0.704 | | |
| **Recipient CHILD Grade** | | |  | | |  | | |
| 1 | | | 1.00 (Ref) | | |  | | |
| 2 | | | 0.19 (0.02-1.55) | | | 0.122 | | |
| 3 | | | 1.60 (0.40-6.41) | | | 0.504 | | |
| **Recipient Gender** | | |  | | |  | | |
| Male | | | 1.00 (Ref) | | |  | | |
| Female | | | 1.57 (0.43-5.70) | | | 0.495 | | |
| **Recipient Blood Type** | | | |  | | |  | | |
| A | | | | 1.00 (Ref) | | |  | | |
| B | | | | 1.68 (0.55-5.13) | | | 0.363 | | |
| O | | | | 0.34 (0.08-1.54) | | | 0.161 | | |
| AB | | | 1.88 (0.42-8.48) | | | 0.412 | | |
| **Recipient Etiology** | | |  | | |  | | |
| Tumor | | | 1.00 (Ref) | | |  | | |
| Liver failure | | | 0.98 (0.30-3.18) | | | 0.971 | | |
| Liver Cirrhosis | | | 0.00 (0.00-Inf) | | | 0.998 | | |
| Others | | | 1.14 (0.15-8.74) | | | 0.902 | | |
| **Donor Hepatic Steatosis** | | |  | | |  | | |
| <30% | | | 1.00 (Ref) | | |  | | |
| ≥30% | | | 1.97 (0.54-7.15) | | | 0.304 | | |
| **Donor age** | | | 1.01 (0.97-1.05) | | | 0.714 | | |
| **Donor BMI** | | | 1.00 (0.84-1.20) | | | 0.956 | | |
| **Donor Crea** | | | 1.00 (1.00-1.00) | | | 0.839 | | |
| **Donor Na** | | | 0.98 (0.93-1.04) | | | 0.521 | | |
| **Donor K** | | | 0.81 (0.36-1.83) | | | 0.619 | | |
| **Donor AST** | | | 1.00 (0.99-1.00) | | | 0.647 | | |
| **Donor ALT** | | | 0.99 (0.97-1.01) | | | 0.293 | | |
| **Donor Tbil** | | | 0.93 (0.87-1.00) | | | 0.063 | | |
| **Donor Hb** | | | 0.99 (0.97-1.02) | | | 0.542 | | |
| **Recipient age** | | | 0.99 (0.95-1.04) | | | 0.720 | | |
| **Recipient BMI** | | | 1.12 (0.98-1.28) | | | 0.105 | | |
| **Recipient MELD Score** | | | 1.03 (0.98-1.08) | | | 0.254 | | |
| **Recipient Child-Pugh Grade** | | | 1.14 (0.88-1.47) | | | 0.314 | | |
| **Recipient Tbil** | | | 1.00 (1.00-1.00) | | | 0.498 | | |
| **Recipient INR** | | | 1.22 (0.91-1.64) | | | 0.185 | | |
| **Recipient ALT** | | | 1.00 (1.00-1.01) | | | 0.312 | | |
| **Recipient AST** | | | 1.00 (1.00-1.01) | | | 0.025* | | |
| **Blood loss** | | | 1.03 (0.98-1.08) | | | 0.199 | | |
| **Blood transfusion** | | | 1.07 (1.01-1.14) | | | 0.034* | | |
| **Surgery time** | | | 1.18 (0.92-1.52) | | | 0.203 | | |
| **Cold Ischemia time** | | | 1.00 (1.00-1.01) | | | 0.096 | | |
| **Anhepatic phase** | | | 1.01 (0.99-1.04) | | | 0.341 | | |

Abbreviation: SCS: static cold storage；IFLT: Ischemia-free liver transplantation ; CI: Confidence Interval; OR: Odds Ratio. CVA: cerebralvascular accident; BMI: body mass index; AST: aspartate aminotransferase; ALT: alanine aminotransferase; Tbil: total bilirubin; Hb: hemoglobin; INR: international normalized ratio; MELD: Model for End-Stage Liver Disease. The use of asterisk is to show that p-value of the statistic is less than 0.05, making it more prominent.
