# Supplementary material
Source: Research Square preprint supplement (doi:10.21203/rs.3.rs-8788390/v1)
Supplement: Supplementary file 5 [file 7f6053b32edb02c74ad70567.docx]

S-Table 1. Univariate Logistic Regression Analysis for ICU Stay >72 hours

| **Characteristic** | | | | **OR (95% CI)** | | --- | | | | **p-value** | | |
| --- | --- | --- | --- | --- | --- | --- | --- | --- | --- |
| **Group** | | |  | | |  | | |
| SCS | | | 1.00 (Ref) | | |  | | |
| IFLT | | | 0.53 (0.27-0.98) | | | 0.050 | | |
| **Donor Blood Type** | | |  | | |  | | |
| A | | | 1.00 (Ref) | | |  | | |
| B | | | 1.06 (0.55-1.98) | | | 0.856 | | |
| O | | | 1.13 (0.64-1.98) | | | 0.681 | | |
| AB | | | 0.39 (0.06-1.51) | | | 0.232 | | |
| **Donor Gender** | | |  | | |  | | |
| Male | | | 1.00 (Ref) | | |  | | |
| Female | | | 0.48 (0.21-1.02) | | | 0.071 | | |
| **Cause of Death** | | |  | | |  | | |
| CVA | | | 1.00 (Ref) | | |  | | |
| Anoxia | | | 1.44 (0.54-3.58) | | | 0.445 | | |
| Head trauma | | | 0.86 (0.48-1.53) | | | 0.609 | | |
| Others | | | 0.43 (0.07-1.71) | | | 0.291 | | |
| **Recipient CHILD Grade** | | |  | | |  | | |
| 1 | | | 1.00 (Ref) | | |  | | |
| 2 | | | 0.39 (0.19-0.75) | | | 0.007* | | |
| 3 | | | 2.44 (1.29-4.65) | | | 0.006* | | |
| **Recipient Gender** | | |  | | |  | | |
| Male | | | 1.00 (Ref) | | |  | | |
| Female | | | 0.55 (0.22-1.22) | | | 0.161 | | |
| **Recipient Blood Type** | | | |  | | |  | | |
| A | | | | 1.00 (Ref) | | |  | | |
| B | | | | 1.14 (0.61-2.11) | | | 0.672 | | |
| O | | | | 1.17 (0.65-2.09) | | | 0.606 | | |
| AB | | | 0.68 (0.22-1.82) | | | 0.473 | | |
| **Recipient Etiology** | | |  | | |  | | |
| Tumor | | | 1.00 (Ref) | | |  | | |
| Liver failure | | | 0.74 (0.39-1.36) | | | 0.336 | | |
| Liver Cirrhosis | | | 0.84 (0.18-3.00) | | | 0.799 | | |
| Others | | | 1.84 (0.63-5.14) | | | 0.248 | | |
| **Donor Hepatic Steatosis** | | |  | | |  | | |
| <30% | | | 1.00 (Ref) | | |  | | |
| ≥30% | | | 0.62 (0.24-1.45) | | | 0.294 | | |
| **Donor age** | | | 1.00 (0.98-1.02) | | | 0.688 | | |
| **Donor BMI** | | | 1.10 (1.01-1.21) | | | 0.036* | | |
| **Donor Crea** | | | 1.00 (1.00-1.00) | | | 0.907 | | |
| **Donor Na** | | | 1.04 (1.01-1.06) | | | 0.006* | | |
| **Donor K** | | | 0.95 (0.64-1.40) | | | 0.800 | | |
| **Donor AST** | | | 1.00 (1.00-1.00) | | | 0.758 | | |
| **Donor ALT** | | | 1.00 (1.00-1.00) | | | 0.616 | | |
| **Donor Tbil** | | | 1.01 (1.00-1.03) | | | 0.071 | | |
| **Donor Hb** | | | 1.01 (1.00-1.02) | | | 0.189 | | |
| **Recipient age** | | | 1.01 (0.99-1.04) | | | 0.313 | | |
| **Recipient BMI** | | | 1.11 (1.03-1.20) | | | 0.010* | | |
| **Recipient MELD Score** | | | 1.05 (1.02-1.08) | | | 0.002* | | |
| **Recipient Child-Pugh Grade** | | | 1.20 (1.05-1.37) | | | 0.009* | | |
| **Recipient Tbil** | | | 1.00 (1.00-1.00) | | | 0.018* | | |
| **Recipient INR** | | | 1.96 (1.31-3.09) | | | 0.002* | | |
| **Recipient ALT** | | | 1.00 (1.00-1.00) | | | 0.523 | | |
| **Recipient AST** | | | 1.00 (1.00-1.01) | | | 0.112 | | |
| **Blood loss** | | | 1.06 (1.02-1.10) | | | 0.001* | | |
| **Blood transfusion** | | | 1.09 (1.04-1.15) | | | <0.001 | | |
| **Surgery time** | | | 1.25 (1.06-1.48) | | | 0.008* | | |
| **Cold Ischemia time** | | | 1.00 (1.00-1.00) | | | 0.017* | | |
| **Anhepatic phase** | | | 1.01 (0.99-1.03) | | | 0.210 | | |

Abbreviation: ICU: intensive care unit; SCS: static cold storage；IFLT: Ischemia-free liver transplantation ; CI: Confidence Interval; OR: Odds Ratio. CVA: cerebralvascular accident; BMI: body mass index; AST: aspartate aminotransferase; ALT: alanine aminotransferase; Tbil: total bilirubin; Hb: hemoglobin; INR: international normalized ratio; MELD: Model for End-Stage Liver Disease. The use of asterisk is to show that p-value of the statistic is less than 0.05, making it more prominent.
