# Supplementary material
Source: Research Square preprint supplement (doi:10.21203/rs.3.rs-8788390/v1)
Supplement: Supplementary file 6 [file d15454c3dd14ad837f0435df.docx]

S-Table 6. Univariate Logistic Regression Analysis for 91-Day Survival

| **Characteristic** | | | | **HR (95% CI)** | | --- | | | | **p-value** | | |
| --- | --- | --- | --- | --- | --- | --- | --- | --- | --- |
| **Group** | | |  | | |  | | |
| SCS | | | 1.00 (Ref) | | |  | | |
| IFLT | | | 0.97 (0.37-2.55) | | | 0.946 | | |
| **Donor Blood Type** | | |  | | |  | | |
| A | | | 1.00 (Ref) | | |  | | |
| B | | | 1.70 (0.67-4.33) | | | 0.263 | | |
| O | | | 0.38 (0.13-1.15) | | | 0.087 | | |
| AB | | | 0.00 (0.00-Inf) | | | 0.997 | | |
| **Donor Gender** | | |  | | |  | | |
| Male | | | 1.00 (Ref) | | |  | | |
| Female | | | 0.74 (0.21-2.53) | | | 0.628 | | |
| **Cause of Death** | | |  | | |  | | |
| CVA | | | 1.00 (Ref) | | |  | | |
| Anoxia | | | 0.00 (0.00-Inf) | | | 0.998 | | |
| Head trauma | | | 0.78 (0.30-2.05) | | | 0.611 | | |
| Others | | | 1.00 (0.13-7.50) | | | 0.999 | | |
| **Recipient CHILD Grade** | | |  | | |  | | |
| 1 | | | 1.00 (Ref) | | |  | | |
| 2 | | | 0.26 (0.06-1.21) | | | 0.086 | | |
| 3 | | | 1.15 (0.36-3.62) | | | 0.812 | | |
| **Recipient Gender** | | |  | | |  | | |
| Male | | | 1.00 (Ref) | | |  | | |
| Female | | | 0.98 (0.29-3.38) | | | 0.980 | | |
| **Recipient Blood Type** | | | |  | | |  | | |
| A | | | | 1.00 (Ref) | | |  | | |
| B | | | | 1.97 (0.79-4.89) | | | 0.145 | | |
| O | | | | 0.35 (0.10-1.19) | | | 0.092 | | |
| AB | | | 1.21 (0.28-5.26) | | | 0.795 | | |
| **Recipient Etiology** | | |  | | |  | | |
| Tumor | | | 1.00 (Ref) | | |  | | |
| Liver failure | | | 0.78 (0.28-2.17) | | | 0.638 | | |
| Liver Cirrhosis | | | 0.00 (0.00-Inf) | | | 0.997 | | |
| Others | | | 0.77 (0.10-5.76) | | | 0.798 | | |
| **Donor Hepatic Steatosis** | | |  | | |  | | |
| <30% | | | 1.00 (Ref) | | |  | | |
| ≥30% | | | 1.23 (0.36-4.24) | | | 0.737 | | |
| **Donor age** | | | 1.01 (0.98-1.05) | | | 0.416 | | |
| **Donor BMI** | | | 1.07 (0.93-1.24) | | | 0.324 | | |
| **Donor Crea** | | | 1.00 (1.00-1.00) | | | 0.897 | | |
| **Donor Na** | | | 1.01 (0.97-1.05) | | | 0.750 | | |
| **Donor K** | | | 0.88 (0.45-1.71) | | | 0.701 | | |
| **Donor AST** | | | 1.00 (1.00-1.00) | | | 0.776 | | |
| **Donor ALT** | | | 1.00 (0.99-1.00) | | | 0.731 | | |
| **Donor Tbil** | | | 0.99 (0.97-1.02) | | | 0.667 | | |
| **Donor Hb** | | | 0.98 (0.96-1.00) | | | 0.039* | | |
| **Recipient age** | | | 1.03 (0.98-1.07) | | | 0.232 | | |
| **Recipient BMI** | | | 1.09 (0.97-1.22) | | | 0.167 | | |
| **Recipient MELD Score** | | | 1.02 (0.98-1.07) | | | 0.373 | | |
| **Recipient Child-Pugh Grade** | | | 1.01 (0.82-1.25) | | | 0.910 | | |
| **Recipient Tbil** | | | 1.00 (1.00-1.00) | | | 0.924 | | |
| **Recipient INR** | | | 1.11 (0.78-1.58) | | | 0.566 | | |
| **Recipient ALT** | | | 1.00 (1.00-1.00) | | | 0.516 | | |
| **Recipient AST** | | | 1.00 (1.00-1.01) | | | 0.054 | | |
| **Blood loss** | | | 1.04 (1.00-1.08) | | | 0.063 | | |
| **Blood transfusion** | | | 1.06 (1.00-1.12) | | | 0.064 | | |
| **Surgery time** | | | 1.15 (0.93-1.43) | | | 0.199 | | |
| **Cold Ischemia time** | | | 1.00 (1.00-1.00) | | | 0.370 | | |
| **Anhepatic phase** | | | 1.01 (0.98-1.04) | | | 0.524 | | |

Abbreviation: SCS: static cold storage；IFLT: Ischemia-free liver transplantation ; CI: Confidence Interval; OR: Odds Ratio. CVA: cerebralvascular accident; BMI: body mass index; AST: aspartate aminotransferase; ALT: alanine aminotransferase; Tbil: total bilirubin; Hb: hemoglobin; INR: international normalized ratio; MELD: Model for End-Stage Liver Disease. The use of asterisk is to show that p-value of the statistic is less than 0.05, making it more prominent.
