# Supplementary material
Source: Research Square preprint supplement (doi:10.21203/rs.3.rs-8788390/v1)
Supplement: Supplementary file 7 [file f94d2ca2e0bebb0a20973233.docx]

S-Table 7. Univariate Logistic Regression Analysis for 365-Day Survival

| **Characteristic** | | | | **HR (95% CI)** | | --- | | | | **p-value** | | |
| --- | --- | --- | --- | --- | --- | --- | --- | --- | --- |
| **Group** | | |  | | |  | | |
| SCS | | | 1.00 (Ref) | | |  | | |
| IFLT | | | 0.75 (0.35-1.61) | | | 0.460 | | |
| **Donor Blood Type** | | |  | | |  | | |
| A | | | 1.00 (Ref) | | |  | | |
| B | | | 1.61 (0.79-3.25) | | | 0.187 | | |
| O | | | 0.51 (0.24-1.08) | | | 0.079 | | |
| AB | | | 0.47 (0.06-3.45) | | | 0.460 | | |
| **Donor Gender** | | |  | | |  | | |
| Male | | | 1.00 (Ref) | | |  | | |
| Female | | | 0.87 (0.36-2.11) | | | 0.761 | | |
| **Cause of Death** | | |  | | |  | | |
| CVA | | | 1.00 (Ref) | | |  | | |
| Anoxia | | | 0.00 (0.00-Inf) | | | 0.997 | | |
| Head trauma | | | 0.60 (0.28-1.28) | | | 0.184 | | |
| Others | | | 1.84 (0.56-6.01) | | | 0.315 | | |
| **Recipient CHILD Grade** | | |  | | |  | | |
| 1 | | | 1.00 (Ref) | | |  | | |
| 2 | | | 1.04 (0.47-2.29) | | | 0.922 | | |
| 3 | | | 0.76 (0.33-1.76) | | | 0.523 | | |
| **Recipient Gender** | | |  | | |  | | |
| Male | | | 1.00 (Ref) | | |  | | |
| Female | | | 0.68 (0.24-1.94) | | | 0.472 | | |
| **Recipient Blood Type** | | | |  | | |  | | |
| A | | | | 1.00 (Ref) | | |  | | |
| B | | | | 1.71 (0.85-3.41) | | | 0.130 | | |
| O | | | | 0.56 (0.25-1.24) | | | 0.151 | | |
| AB | | | 0.97 (0.30-3.17) | | | 0.960 | | |
| **Recipient Etiology** | | |  | | |  | | |
| Tumor | | | 1.00 (Ref) | | |  | | |
| Liver failure | | | 0.56 (0.24-1.29) | | | 0.175 | | |
| Liver Cirrhosis | | | 0.00 (0.00-Inf) | | | 0.996 | | |
| Others | | | 2.04 (0.72-5.79) | | | 0.181 | | |
| **Donor Hepatic Steatosis** | | |  | | |  | | |
| <30% | | | 1.00 (Ref) | | |  | | |
| ≥30% | | | 1.51 (0.62-3.64) | | | 0.362 | | |
| **Donor age** | | | 1.01 (0.99-1.04) | | | 0.406 | | |
| **Donor BMI** | | | 1.08 (0.98-1.20) | | | 0.135 | | |
| **Donor Crea** | | | 1.00 (1.00-1.00) | | | 0.871 | | |
| **Donor Na** | | | 1.02 (0.99-1.05) | | | 0.151 | | |
| **Donor K** | | | 0.86 (0.52-1.41) | | | 0.544 | | |
| **Donor AST** | | | 1.00 (1.00-1.00) | | | 0.793 | | |
| **Donor ALT** | | | 1.00 (1.00-1.00) | | | 0.669 | | |
| **Donor Tbil** | | | 0.99 (0.97-1.01) | | | 0.388 | | |
| **Donor Hb** | | | 1.00 (0.98-1.01) | | | 0.804 | | |
| **Recipient age** | | | 1.03 (1.00-1.06) | | | 0.069 | | |
| **Recipient BMI** | | | 1.05 (0.96-1.15) | | | 0.318 | | |
| **Recipient MELD Score** | | | 1.00 (0.97-1.04) | | | 0.822 | | |
| **Recipient Child-Pugh Grade** | | | 0.99 (0.85-1.16) | | | 0.900 | | |
| **Recipient Tbil** | | | 1.00 (1.00-1.00) | | | 0.970 | | |
| **Recipient INR** | | | 1.04 (0.75-1.44) | | | 0.822 | | |
| **Recipient ALT** | | | 1.00 (1.00-1.00) | | | 0.619 | | |
| **Recipient AST** | | | 1.00 (1.00-1.01) | | | 0.080 | | |
| **Blood loss** | | | 1.04 (1.01-1.07) | | | 0.014* | | |
| **Blood transfusion** | | | 1.06 (1.01-1.11) | | | 0.013* | | |
| **Surgery time** | | | 1.12 (0.95-1.33) | | | 0.176 | | |
| **Cold Ischemia time** | | | 1.00 (1.00-1.00) | | | 0.179 | | |
| **Anhepatic phase** | | | 1.01 (0.99-1.03) | | | 0.172 | | |

Abbreviation: SCS: static cold storage；IFLT: Ischemia-free liver transplantation ; CI: Confidence Interval; OR: Odds Ratio. CVA: cerebralvascular accident; BMI: body mass index; AST: aspartate aminotransferase; ALT: alanine aminotransferase; Tbil: total bilirubin; Hb: hemoglobin; INR: international normalized ratio; MELD: Model for End-Stage Liver Disease. The use of asterisk is to show that p-value of the statistic is less than 0.05, making it more prominent.
